# Supplementary material
Source: PubMed Central journal article supplement (PMC6726931)
Supplement: tpmd190161.SD1.pdf [file tpmd190161.SD1.pdf]

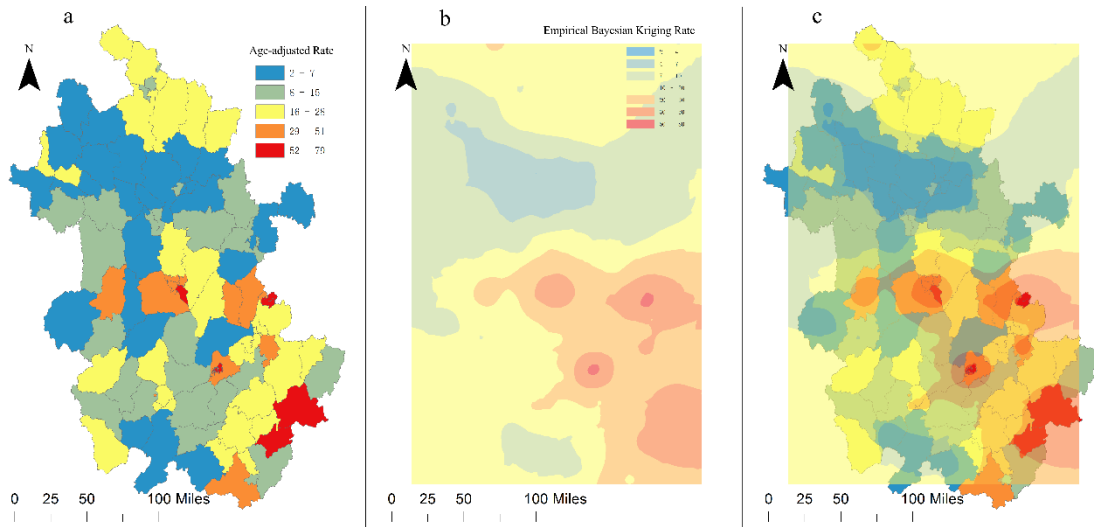

**Supplemental Figure S1.** Comparison between age-adjusted rate and empirical Bayesian smoothing rate. (Panel a: Age-adjusted rate. Panel b: empirical Bayesian smoothing rate. Panel c: Panel a and b overlap.)
